# Supplementary material for: Highly branched isoprenoids for Southern Ocean sea ice reconstructions: a pilot study from the Western Antarctic Peninsula
Source: Copernicus journal article supplement (doi:10.5194/bg-16-2961-2019), 2019-08-02
Supplement: Supplementary file 1 [file bg-16-2961-2019-supplement.pdf]

Supplement of Biogeosciences, 16, 2961–2981, 2019  
<https://doi.org/10.5194/bg-16-2961-2019-supplement>  
© Author(s) 2019. This work is distributed under  
the Creative Commons Attribution 4.0 License.

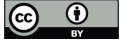

*Supplement of*

## **Highly branched isoprenoids for Southern Ocean sea ice reconstructions: a pilot study from the Western Antarctic Peninsula**

**Maria-Elena Vorrath et al.**

*Correspondence to:* Maria-Elena Vorrath ([maria-elena.vorrath@awi.de](mailto:maria-elena.vorrath@awi.de))

The copyright of individual parts of the supplement might differ from the CC BY 4.0 License.

## Supplementary Material

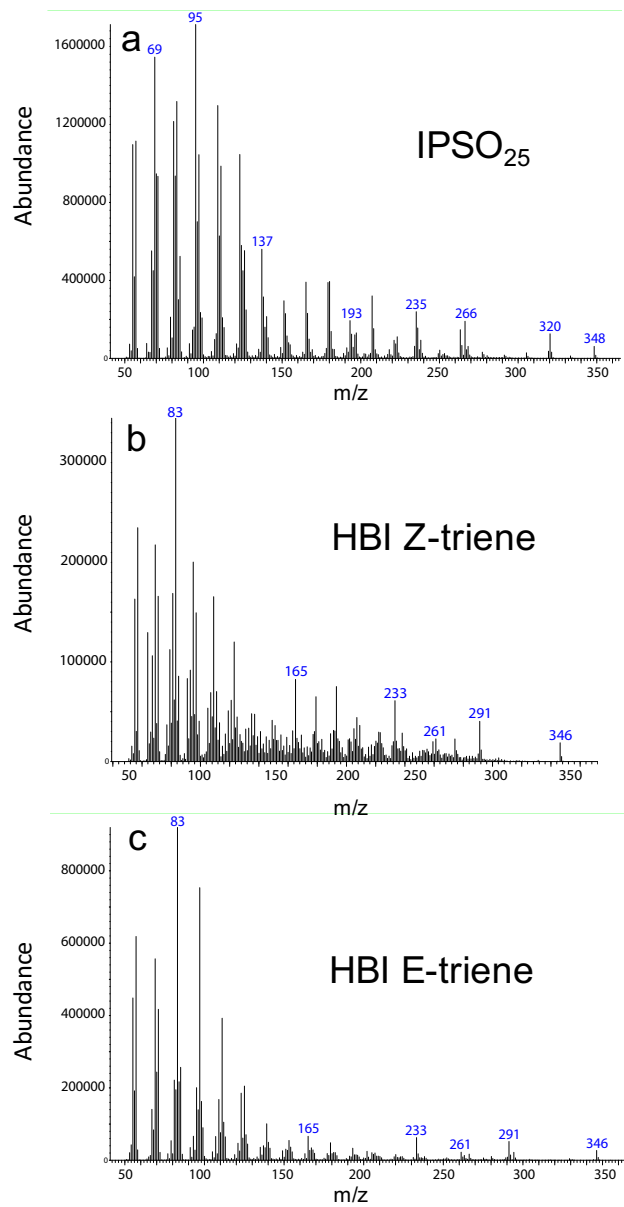

**Supplement S1: Examples of mass spectra of IPSO<sub>25</sub> (m/z 348), HBI Z-triene and E-triene (both m/z 346) obtained from surface sediments in the study area.**

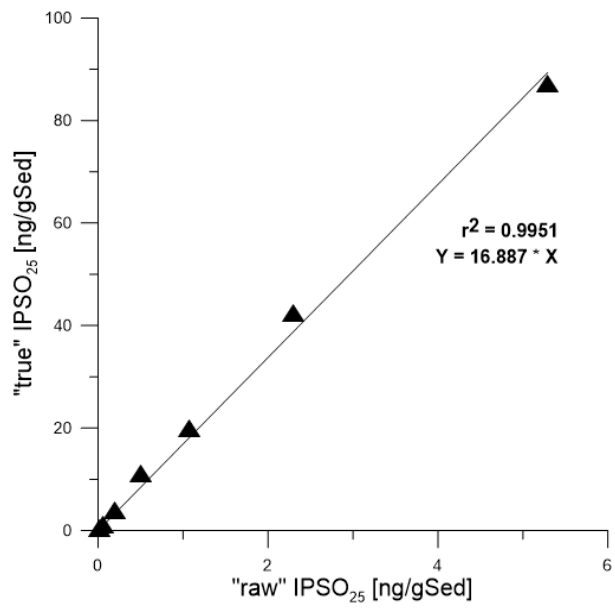

**Supplement S2: Example calibration curve for the quantification of IPSO<sub>25</sub>. Different (true) IPSO<sub>25</sub> concentrations determined via gas chromatography-flame ionization are plotted against (raw) IPSO<sub>25</sub> concentrations determined via gas chromatography-mass spectrometry using selected ion monitoring (m/z 348). The instrumental response factor is obtained from the regression line.**
